# Supplementary material for: Identifying Putative Resistance Genes for Barley Yellow Dwarf Virus-PAV in Wheat and Barley
Source: MDPI journal article supplement (doi:10.3390/v15030716), 2023-03-09

# Title: Identifying Putative Resistance Genes for Barley Yellow Dwarf Virus-PAV in Wheat and Barley

**Table S1.** List of the primers used in this study.

(sequences, amplicon sizes, GenBank (NCBI database) accession numbers and efficiencies of all primers used in qPCR experiments with samples of *Hordeum vulgare* and *Triticum aestivum* (2 pairs designed per gene of interest). Primers for reference genes and BYDV-PAV standard [17] are also included.)

| ID         | Target Gene                                      | GenBank    | species                  | Sequence (5'->3') |                        | position    | Amplicon size (bp) | Efficiency (%) | References |
|------------|--------------------------------------------------|------------|--------------------------|-------------------|------------------------|-------------|--------------------|----------------|------------|
| NBS        | rga S-9203: resistance gene of the NBS-LRR class | AJ507095.1 | <i>Hordeum vulgare</i>   | 1F                | CACCACCGAGAGAATAGAACCA | 17-38       | 170                | 110            |            |
|            |                                                  |            |                          | 1R                | TCCTTGAGAAACGCCACCT    | 186-168     |                    |                |            |
|            |                                                  |            |                          | 2F                | TGTTGGGTTTGGGGGTCT     | 652-669     | 172                | 110            |            |
|            |                                                  |            |                          | 2R                | GTCAGTATGGGTGCTTGTGG   | 823-803     |                    |                |            |
|            | NBS-LRR resistance gene homologue from TcLr35    | DQ205351.2 | <i>Triticum aestivum</i> | 1F                | TGGTCGGTTTTGAGGACGAG   | 726-745     | 113                | 94             |            |
|            |                                                  |            |                          | 1R                | AAGCGTTGTTTTTCCTGCCC   | 838-819     |                    |                |            |
|            |                                                  |            |                          | 2F                | AGGGTTGCAGTCTTGGTGAG   | 484-423     | 150                | 103            |            |
|            |                                                  |            |                          | 2R                | CAAGTCAGTCGGTAGGCGAG   | 553-534     |                    |                |            |
| CC-NBS-LRR | disease resistance protein RGA2-like             | AK371901.1 | <i>Hordeum vulgare</i>   | 1F                | GCAGTGTTTCCGGGTGACTA   | 1539-1558   | 145                | 105            |            |
|            |                                                  |            |                          | 1R                | AGCATCGCTCGACAAGTTCA   | 1683-1664   |                    |                |            |
|            |                                                  |            |                          | 2F                | ACGCCAAATGGTACAGCTCA   | 2321-2340   | 71                 | 110            |            |
|            |                                                  |            |                          | 2R                | TGAACCCACTAGCATCGCTC   | 2391-2372   |                    |                |            |
|            | coiled-coil nucleotide-binding leucine-rich      | MW656173.1 | <i>Triticum aestivum</i> | 1F                | CCACCTCCTCTCGTACTCCA   | 11402-11421 | 85                 | 106            |            |

|         |                                                                           |            |                              |    |                      |                 |     |     |                  |
|---------|---------------------------------------------------------------------------|------------|------------------------------|----|----------------------|-----------------|-----|-----|------------------|
|         | repeat (CC-NB-LRR)<br>immune receptor (Lr13)<br>gene                      |            |                              | 1R | ACTGGTATGCTGTTCTGCCC | 11486-<br>11467 |     |     | In this<br>study |
|         |                                                                           |            |                              | 2F | TTGCTGGCGTGATTGACTCT | 17656-<br>17675 | 163 | 93  |                  |
|         |                                                                           |            |                              | 2R | GTTGAAGGTAGGGTGCCGAA | 17818-<br>17799 |     |     |                  |
| Rec Kin | LRR receptor-like<br><br>serine/threonine-<br>protein kinase<br>At3g47570 | AK364948.1 | <i>Hordeum<br/>vulgare</i>   | 1F | TTTACTGCGGTGGGAGCATT | 632-651         | 88  | 108 |                  |
|         |                                                                           |            |                              | 1R | CTTGGTGGGCATCACCTCTT | 719-700         |     |     |                  |
|         |                                                                           |            |                              | 2F | TGTTGCTGCTCCAGTTTCA  | 1569-<br>1588   | 89  | 110 |                  |
|         |                                                                           |            |                              | 2R | TTCTTTCACCACATCGCCCA | 1657-<br>1638   |     |     |                  |
|         | LRR receptor-like<br><br>kinase                                           | GU084176.1 | <i>Triticum<br/>aestivum</i> | 1F | GCTTCTTCTGCTGGCGTTTC | 125-144         | 154 | 98  |                  |
|         |                                                                           |            |                              | 1R | GCTTCGGTTCAGTTCCTCA  | 278-259         |     |     |                  |
|         |                                                                           |            |                              | 2F | TAACGACAGCGAAAACCCCA | 2642-<br>2661   | 95  | 107 |                  |
|         |                                                                           |            |                              | 2R | TGCCGAAATCCCCCAAATGA | 2736-<br>2717   |     |     |                  |
| Cas Kin | Casein kinase                                                             | MT363976.1 | <i>Hordeum<br/>vulgare</i>   | 1F | ACTACAAAGGCCGTCAAGGG | 617-636         | 71  | 101 |                  |
|         |                                                                           |            |                              | 1R | AACATCCCAAAGGCTAGGGC | 687-668         |     |     |                  |
|         |                                                                           |            |                              | 2F | AAGATGGATGGCGTGAGTCC | 313-332         | 148 | 102 |                  |
|         |                                                                           |            |                              | 2R | TGCCAACATAAACCTGCCCA | 460-441         |     |     |                  |
|         | Casein kinase-like<br><br>protein                                         | AF479055.1 | <i>Triticum<br/>aestivum</i> | 1F | AACATCTGCTTTCCCGAGCC | 255-274         | 84  | 100 |                  |
|         |                                                                           |            |                              | 1R | GCCGCCCTTCCATAGCATA  | 338-320         |     |     |                  |
|         |                                                                           |            |                              | 2F | GCAGTCGTCATGTCCCGAA  | 58-76           | 81  | 105 |                  |
|         |                                                                           |            |                              | 2R | ATGGATGCCCTCACTTGGAT | 138-119         |     |     |                  |
| Pro Kin | Protein kinase                                                            | AJ495779.1 | <i>Hordeum<br/>vulgare</i>   | 1F | TGGAATCGTGATGTGGGAGC | 565-584         | 103 | 105 |                  |
|         |                                                                           |            |                              | 1R | CAGAGGCCGTAAGGTGTTGT | 667-648         |     |     |                  |
|         |                                                                           |            |                              | 2F | CTAAGAGATCCCCAACGCCC | 395-414         | 89  | 104 |                  |
|         |                                                                           |            |                              | 2R | CGCACTCCACCAGAGATCAG | 483-464         |     |     |                  |
|         | Protein kinase                                                            | MH551224.1 |                              | 1F | TTCAGCCATGTCAAAGGCCA | 50-69           | 108 | 103 |                  |

|          |                                                                                     |            |                          |    |                      |           |     |     |
|----------|-------------------------------------------------------------------------------------|------------|--------------------------|----|----------------------|-----------|-----|-----|
|          |                                                                                     |            | <i>Triticum aestivum</i> | 1R | TAGTCATCCTGCTCACCCCA | 157-138   |     |     |
|          |                                                                                     |            |                          | 2F | GTCTTGGCTGCATGTTTGCT | 691-710   | 186 | 104 |
|          |                                                                                     |            |                          | 2R | TTCTGCTGTGCCTTCCAACA | 876-857   |     |     |
| Pro Phos | Protein Phosphatase 2B<br>Regulatory Subunit<br>(Calcineurin<br>Regulatory Subunit) | BM816073.1 | <i>Hordeum vulgare</i>   | 1F | GAAGAAGCCGGGTACACACA | 525-544   | 124 | 99  |
|          |                                                                                     |            |                          | 1R | ATCCACATTCGCCGTTCACT | 648-629   |     |     |
|          |                                                                                     |            |                          | 2F | CTGGTAGAGGTTTTGCGGGA | 447-466   | 99  | 99  |
|          |                                                                                     |            |                          | 2R | CTGTGTGTACCCGGCTTCTT | 545-526   |     |     |
|          | Serine/threonine-<br>protein phosphatase<br>PP2A-1 catalytic<br>subunit (PP2Ac-1)   | EF101900   | <i>Triticum aestivum</i> | 1F | CGTGTCCAAGAGGTTCCACA | 611-630   | 98  | 105 |
|          |                                                                                     |            |                          | 1R | CCAGCACCACGAGGAGAAAT | 708-689   |     |     |
|          |                                                                                     |            |                          | 2F | CAGCCCTGGTGGAATCTGAA | 525-544   | 169 | 103 |
|          |                                                                                     |            |                          | 2R | GAAATGCCCCAACCACATCG | 693-674   |     |     |
| Myb      | transcription factor<br>GAMYB                                                       | AK251726.1 | <i>Hordeum vulgare</i>   | 1F | GGGGACACTTCGTCTCATCC | 1729-1748 | 138 | 110 |
|          |                                                                                     |            |                          | 1R | GAAAACAGGCTTGCACTCCG | 1866-1847 |     |     |
|          |                                                                                     |            |                          | 2F | GAGTGCAAGCCTGTTTTCGG | 1849-1868 | 115 | 110 |
|          |                                                                                     |            |                          | 2R | TGGAGGTTCCGTGAGGAACT | 1963-1944 |     |     |
|          | R2R3-MYB<br>transcription factor<br>(RIM1)                                          | KU864997.1 | <i>Triticum aestivum</i> | 1F | ACAGCTTTTGGTCGGAGACA | 655-674   | 120 | 97  |
|          |                                                                                     |            |                          | 1R | AGTCCATCTCGTCGTTGCTG | 774-755   |     |     |
|          |                                                                                     |            |                          | 2F | GCCATGCTCGGCAATAGATG | 345-364   | 97  | 101 |
|          |                                                                                     |            |                          | 2R | GCTTCTTGAGGTGTGTGTGC | 441-422   |     |     |
| Gras     | GRAS-domain<br>transcription factor                                                 | AK371946.1 | <i>Hordeum vulgare</i>   | 1F | CCTTCTTCATGCCCTCTCG  | 924-943   | 117 | 109 |
|          |                                                                                     |            |                          | 1R | GGTGGTTTCGGGTGAGGTAG | 1040-1021 |     |     |
|          |                                                                                     |            |                          | 2F | TCCCATGCTGTTCCACGAAG | 811-830   | 91  | 107 |
|          |                                                                                     |            |                          | 2R | GTGCTGGTGCTGATACTGGT | 901-882   |     |     |
|          | GRAS transcription<br>factor SHRCD                                                  | KT809308.1 | <i>Triticum aestivum</i> | 1F | GGCATGTTCCCCTCCGAC   | 213-230   | 70  | 102 |
|          |                                                                                     |            |                          | 1R | GGTCCTTCCACCCGAGCTT  | 282-264   |     |     |
|          |                                                                                     |            |                          | 2F | GGCGCAGTCCGGGTTC     | 146-161   | 85  | 108 |

|                  |                                                         |                                          |                              |                   |                         |         |                       |                       |                 |      |
|------------------|---------------------------------------------------------|------------------------------------------|------------------------------|-------------------|-------------------------|---------|-----------------------|-----------------------|-----------------|------|
|                  |                                                         |                                          |                              | 2R                | GTCGGAGGGGAACATGCC      | 230-213 |                       |                       |                 |      |
| Mads             | MADS-box<br>transcription factor<br>(type II subfamily) | AK370732.1                               | <i>Hordeum<br/>vulgare</i>   | 1F                | TATTTGAAGATGGGGCGGGG    | 171-190 | 132                   | 97                    |                 |      |
|                  |                                                         |                                          |                              | 1R                | GGCATCGCAGAGAATACCCA    | 302-283 |                       |                       |                 |      |
|                  |                                                         |                                          |                              | 2F                | CGGCAGTTGATGGGACAAGA    | 501-520 | 163                   | 107                   |                 |      |
|                  |                                                         |                                          |                              | 2R                | CTTGGTGGACAAGACTCCCC    | 663-644 |                       |                       |                 |      |
|                  | MADS box<br>transcription factor                        | AB084577.1                               | <i>Triticum<br/>aestivum</i> | 1F                | CAACAGCGTGAAAGCAACCA    | 304-323 | 97                    | 108                   |                 |      |
|                  |                                                         |                                          |                              | 1R                | CTGGTAGTGCTGGGCATTGA    | 400-381 |                       |                       |                 |      |
|                  |                                                         |                                          |                              | 2F                | GGAGGGAAGGCTGGACAAAG    | 508-527 | 156                   | 102                   |                 |      |
|                  |                                                         |                                          |                              | 2R                | TGTTGCCCCCTTTCAGTCTC    | 663-644 |                       |                       |                 |      |
| Reference Gene   |                                                         |                                          |                              | Sequence (5'->3') |                         |         | Amplicon<br>size (bp) | Efficiency<br>%       |                 |      |
| TubB             | beta-tubulin                                            |                                          |                              | F                 | CAAGGAGGTGGACGAGCAGATG  |         | 84                    | 90                    | [24]            |      |
|                  |                                                         |                                          |                              | R                 | GACTTGACGTTGTTGGGGATCCA |         |                       |                       |                 |      |
| GAPDH            | Glyceraldehyde-3-phosphate dehydrogenase                |                                          |                              | F                 | TGTCCATGCCATGACTGCAA    |         | 105                   | 101                   |                 |      |
|                  |                                                         |                                          |                              | R                 | CCAGTGCTGCTTGAATGATG    |         |                       |                       |                 |      |
| Calibration gene |                                                         | species                                  |                              | Sequence (5'->3') |                         |         | position              | Amplicon<br>size (bp) | Efficiency<br>% |      |
| PVinterF         | Coat protein                                            | Luteovirus, Barley yellow<br>dwarf virus |                              | F                 | GTTGAGTTTAAGTCACACGC    |         | 3182-<br>3201         | 294                   | 99              | [24] |
| YanRA            |                                                         |                                          |                              | R                 | TGTTGAGGAGTCTACCTATTTG  |         | 3475-<br>3454         |                       |                 | [29] |

**Table S2.** Expression profile showing the fold change mean values, SEM and TTest.

(A. Barley 10 dai; B. Barley 30 dai; C. Wheat 10 dai; D. Wheat 30 dai)

| <b>A</b><br>Target gene     |         | Graciosa 10 dai |          | Travira 10 dai |          | Wbon 10 dai |          | Wysor 10 dai |          | V08:3 10 dai |          | V13:8 10 dai |          |
|-----------------------------|---------|-----------------|----------|----------------|----------|-------------|----------|--------------|----------|--------------|----------|--------------|----------|
|                             |         | Control         | Infected | Control        | Infected | Control     | Infected | Control      | Infected | Control      | Infected | Control      | Infected |
| <i>NBS</i>                  | AVERAGE | 1.000           | 3.843    | 1.000          | 1.230    | 1.000       | 0.767    | 1.000        | 0.874    | 1.000        | 0.855    | 1.000        | 1.787    |
|                             | SEM     | 0.182           | 0.734    | 0.112          | 0.186    | 0.269       | 0.461    | 0.157        | 0.173    | 0.069        | 0.010    | 0.268        | 0.621    |
|                             | TTEST   |                 | 0.020    |                | 0.348    |             | 0.665    |              | 0.635    |              | 0.203    |              | 0.309    |
| <i>CC-NBS-LRR</i>           | AVERAGE | 1.000           | 5.845    | 1.000          | 2.883    | 1.000       | 0.773    | 1.000        | 0.857    | 1.000        | 1.483    | 1.000        | 2.387    |
|                             | SEM     | 0.116           | 0.691    | 0.068          | 0.717    | 0.298       | 0.200    | 0.131        | 0.190    | 0.097        | 0.169    | 0.224        | 0.804    |
|                             | TTEST   |                 | 0.002    |                | 0.059    |             | 0.621    |              | 0.561    |              | 0.073    |              | 0.172    |
| <i>Receptor-like Kinase</i> | AVERAGE | 1.000           | 7.021    | 1.000          | 3.266    | 1.000       | 0.815    | 1.000        | 0.472    | 1.000        | 1.089    | 1.000        | 2.166    |
|                             | SEM     | 0.133           | 2.019    | 0.159          | 0.720    | 0.370       | 0.303    | 0.105        | 0.129    | 0.095        | 0.098    | 0.545        | 0.793    |
|                             | TTEST   |                 | 0.041    |                | 0.037    |             | 0.749    |              | 0.050    |              | 0.578    |              | 0.292    |
| <i>Casein Kinase</i>        | AVERAGE | 1.000           | 1.723    | 1.000          | 2.181    | 1.000       | 0.442    | 1.000        | 1.158    | 1.000        | 1.641    | 1.000        | 0.969    |
|                             | SEM     | 0.211           | 0.277    | 0.290          | 0.356    | 0.163       | 0.184    | 0.017        | 0.269    | 0.148        | 0.446    | 0.360        | 0.133    |
|                             | TTEST   |                 | 0.106    |                | 0.062    |             | 0.113    |              | 0.589    |              | 0.193    |              | 0.940    |
| <i>Protein Phosphatase</i>  | AVERAGE | 1.000           | 1.268    | 1.000          | 1.664    | 1.000       | 0.510    | 1.000        | 0.877    | 1.000        | 0.949    | 1.000        | 0.754    |
|                             | SEM     | 0.144           | 0.180    | 0.131          | 0.236    | 0.150       | 0.021    | 0.014        | 0.177    | 0.151        | 0.136    | 0.125        | 0.083    |
|                             | TTEST   |                 | 0.309    |                | 0.070    |             | 0.085    |              | 0.424    |              | 0.831    |              | 0.177    |
| <i>Protein Kinase</i>       | AVERAGE | 1.000           | 2.769    | 1.000          | 1.481    | 1.000       | 0.475    | 1.000        | 1.027    | 1.000        | 1.232    | 1.000        | 1.099    |
|                             | SEM     | 0.203           | 0.124    | 0.033          | 0.036    | 0.177       | 0.142    | 0.010        | 0.685    | 0.069        | 0.182    | 0.208        | 0.293    |
|                             | TTEST   |                 | 0.002    |                | 0.001    |             | 0.129    |              | 0.962    |              | 0.250    |              | 0.797    |
| <i>MYB TF</i>               | AVERAGE | 1.000           | 4.540    | 1.000          | 0.852    | 1.000       | 0.704    | 1.000        | 0.549    | 1.000        | 0.723    | 1.000        | 0.850    |
|                             | SEM     | 0.266           | 0.592    | 0.175          | 0.176    | 0.014       | 0.070    | 0.121        | 0.041    | 0.129        | 0.018    | 0.084        | 0.012    |
|                             | TTEST   |                 | 0.004    |                | 0.583    |             | 0.013    |              | 0.066    |              | 0.195    |              | 0.152    |
| <i>GRAS TF</i>              | AVERAGE | 1.000           | 2.510    | 1.000          | 1.258    | 1.000       | 1.038    | 1.000        | 1.062    | 1.000        | 1.080    | 1.000        | 0.995    |
|                             | SEM     |                 | 0.013    | 0.098          | 0.083    | 0.140       | 0.136    | 0.036        | 0.710    | 0.060        | 0.150    | 0.494        | 0.219    |
|                             | TTEST   |                 | 0.001    |                | 0.116    |             | 0.866    |              | 0.914    |              | 0.598    |              | 0.993    |
| <i>MADS-box TF</i>          | AVERAGE | 1.000           | 4.540    | 1.000          | 2.458    | 1.000       | 0.739    | 1.000        | 1.764    | 1.000        | 1.444    | 1.000        | 1.832    |
|                             | SEM     | 0.109           | 0.592    | 0.095          | 0.024    | 0.261       | 0.196    | 0.100        | 1.296    | 0.083        | 0.367    | 0.254        | 0.665    |
|                             | TTEST   |                 | 0.888    |                | 0.0001   |             | 0.528    |              | 0.490    |              | 0.228    |              | 0.307    |

| B<br>Target gene     |         | Graciosa 30 dai |          | Travira 30 dai |          | Wbon 30 dai |          | Wysor 30 dai |          | V08:3 30 dai |          | V13:8 30 dai |          |
|----------------------|---------|-----------------|----------|----------------|----------|-------------|----------|--------------|----------|--------------|----------|--------------|----------|
|                      |         | Control         | Infected | Control        | Infected | Control     | Infected | Control      | Infected | Control      | Infected | Control      | Infected |
| NBS                  | AVERAGE | 1.000           | 3.314    | 1.000          | 2.082    | 1.000       | 1.623    | 1.000        | 1.208    | 1.000        | 0.898    | 1.000        | 0.563    |
|                      | SEM     | 0.010           | 0.835    | 0.243          | 0.170    | 0.073       | 0.392    | 0.113        | 0.222    | 0.136        | 0.156    | 0.065        | 0.075    |
|                      | TTEST   |                 | 0.050    |                | 0.022    |             | 0.194    |              | 0.450    |              | 0.648    |              | 0.012    |
| CC-NBS-LRR           | AVERAGE | 1.000           | 2.857    | 1.000          | 1.781    | 1.000       | 1.413    | 1.000        | 1.439    | 1.000        | 0.529    | 1.000        | 0.436    |
|                      | SEM     | 0.165           | 0.324    | 0.152          | 0.414    | 0.181       | 0.230    | 0.111        | 0.103    | 0.295        | 0.133    | 0.035        | 0.084    |
|                      | TTEST   |                 | 0.007    |                | 0.152    |             | 0.231    |              | 0.044    |              | 0.219    |              | 0.003    |
| Receptor-like Kinase | AVERAGE | 1.000           | 10.429   | 1.000          | 2.677    | 1.000       | 0.814    | 1.000        | 0.402    | 1.000        | 0.204    | 1.000        | 0.347    |
|                      | SEM     | 0.052           | 0.964    | 0.248          | 0.449    | 0.170       | 0.093    | 0.154        | 0.122    | 0.291        | 0.026    | 0.096        | 0.048    |
|                      | TTEST   |                 | 0.001    |                | 0.031    |             | 0.392    |              | 0.038    |              | 0.053    |              | 0.004    |
| Casein Kinase        | AVERAGE | 1.000           | 2.621    | 1.000          | 1.908    | 1.000       | 1.953    | 1.000        | 1.129    | 1.000        | 0.248    | 1.000        | 1.012    |
|                      | SEM     | 0.078           | 0.179    | 0.203          | 0.092    | 0.053       | 0.246    | 0.182        | 0.072    | 0.062        | 0.019    | 0.113        | 0.195    |
|                      | TTEST   |                 | 0.001    |                | 0.015    |             | 0.019    |              | 0.546    |              | 0.064    |              | 0.960    |
| Protein Phosphatase  | AVERAGE | 1.000           | 1.504    | 1.000          | 1.109    | 1.000       | 1.291    | 1.000        | 1.348    | 1.000        | 1.418    | 1.000        | 0.702    |
|                      | SEM     | 0.169           | 0.103    | 0.180          | 0.206    | 0.105       | 0.072    | 0.093        | 0.201    | 0.062        | 0.061    | 0.087        | 0.059    |
|                      | TTEST   |                 | 0.063    |                | 0.711    |             | 0.083    |              | 0.191    |              | 0.009    |              | 0.047    |
| Protein Kinase       | AVERAGE | 1.000           | 1.775    | 1.000          | 1.252    | 1.000       | 1.538    | 1.000        | 1.524    | 1.000        | 1.488    | 1.000        | 0.878    |
|                      | SEM     | 0.076           | 0.212    | 0.119          | 0.057    | 0.118       | 0.209    | 0.274        | 0.148    | 0.149        | 0.034    | 0.019        | 0.084    |
|                      | TTEST   |                 | 0.026    |                | 0.129    |             | 0.088    |              | 0.168    |              | 0.033    |              | 0.228    |
| MYB TF               | AVERAGE | 1.000           | 2.106    | 1.000          | 1.498    | 1.000       | 1.105    | 1.000        | 1.038    | 1.000        | 0.598    | 1.000        | 0.849    |
|                      | SEM     | 0.152           | 0.261    | 0.206          | 0.313    | 0.097       | 0.098    | 0.260        | 0.222    | 0.099        | 0.046    | 0.195        | 0.140    |
|                      | TTEST   |                 | 0.022    |                | 0.255    |             | 0.489    |              | 0.917    |              | 0.021    |              | 0.563    |
| GRAS TF              | AVERAGE | 1.000           | 0.786    | 1.000          | 1.208    | 1.000       | 1.242    | 1.000        | 1.437    | 1.000        | 0.476    | 1.000        | 0.273    |
|                      | SEM     | 0.229           | 0.039    | 0.232          | 0.166    | 0.071       | 0.208    | 0.485        | 0.371    | 0.298        | 0.056    | 0.159        | 0.056    |
|                      | TTEST   |                 | 0.408    |                | 0.507    |             | 0.334    |              | 0.514    |              | 0.159    |              | 0.013    |
| MADS-box TF          | AVERAGE | 1.000           | 0.569    | 1.000          | 1.652    | 1.000       | 1.347    | 1.000        | 0.658    | 1.000        | 0.136    | 1.000        | 0.305    |
|                      | SEM     | 0.243           | 0.047    | 0.339          | 0.233    | 0.250       | 0.537    | 0.632        | 0.169    | 0.408        | 0.019    | 0.167        | 0.155    |
|                      | TTEST   |                 | 0.157    |                | 0.188    |             | 0.590    |              | 0.629    |              | 0.102    |              | 0.169    |

| C<br>Target gene     |         | Semper 10 dai |          | SGS27-02_10 dai |          | Tobak 10 dai |          | Sparta 10 dai |          | Elan 10 dai |          | PSR 3628_10 dai |          |
|----------------------|---------|---------------|----------|-----------------|----------|--------------|----------|---------------|----------|-------------|----------|-----------------|----------|
|                      |         | Control       | Infected | Control         | Infected | Control      | Infected | Control       | Infected | Control     | Infected | Control         | Infected |
| NBS                  | AVERAGE | 1.000         | 31.864   | 1.000           | 18.342   | 1.000        | 7.319    | 1.000         | 5.890    | 1.000       | 2.098    | 1.000           | 1.887    |
|                      | SEM     | 0.119         | 2.684    | 0.262           | 3.064    | 0.575        | 1.150    | 0.229         | 1.782    | 0.392       | 1.276    | 0.444           | 0.491    |
|                      | TTEST   |               | 0.0003   |                 | 0.030    |              | 0.008    |               | 0.053    |             | 0.457    |                 | 0.251    |
| CC-NBS-LRR           | AVERAGE | 1.000         | 13.875   | 1.000           | 2.478    | 1.000        | 10.377   | 1.000         | 4.617    | 1.000       | 2.542    | 1.000           | 0.765    |
|                      | SEM     | 0.736         | 2.846    | 0.687           | 1.226    | 0.072        | 2.151    | 0.324         | 1.770    | 0.164       | 0.702    | 0.676           | 0.213    |
|                      | TTEST   |               | 0.012    |                 | 0.352    |              | 0.010    |               | 0.115    |             | 0.124    |                 | 0.757    |
| Receptor-like Kinase | AVERAGE | 1.000         | 20.345   | 1.000           | 13.595   | 1.000        | 2.385    | 1.000         | 0.519    | 1.001       | 0.689    | 1.000           | 0.396    |
|                      | SEM     | 0.354         | 2.165    | 0.353           | 4.307    | 0.210        | 0.518    | 0.137         | 0.091    | 0.222       | 0.153    | 0.204           | 0.042    |
|                      | TTEST   |               | 0.001    |                 | 0.043    |              | 0.061    |               | 0.043    |             | 0.177    |                 | 0.044    |
| Casein Kinase        | AVERAGE | 1.000         | 6.161    | 1.000           | 1.811    | 1.000        | 4.165    | 1.000         | 1.652    | 1.000       | 2.649    | 1.000           | 0.949    |
|                      | SEM     | 0.037         | 1.907    | 0.071           | 0.290    | 0.003        | 0.398    | 0.106         | 0.108    | 0.575       | 0.101    | 0.483           | 0.196    |
|                      | TTEST   |               | 0.054    |                 | 0.053    |              | 0.002    |               | 0.012    |             | 0.048    |                 | 0.927    |
| Protein Phosphatase  | AVERAGE | 1.000         | 7.951    | 1.000           | 1.438    | 1.000        | 1.660    | 1.000         | 1.775    | 1.000       | 1.860    | 1.000           | 0.941    |
|                      | SEM     | 0.256         | 0.992    | 0.141           | 0.166    | 0.076        | 0.019    | 0.264         | 0.305    | 0.144       | 0.445    | 0.470           | 0.001    |
|                      | TTEST   |               | 0.002    |                 | 0.115    |              | 0.007    |               | 0.127    |             | 0.140    |                 | 0.906    |
| Protein Kinase       | AVERAGE | 1.000         | 0.397    | 1.000           | 1.444    | 1.000        | 1.918    | 1.000         | 0.849    | 1.000       | 1.454    | 1.000           | 1.012    |
|                      | SEM     | 0.070         | 0.063    | 0.143           | 0.062    | 0.045        | 0.321    | 0.099         | 0.130    | 0.335       | 0.439    | 0.405           | 0.056    |
|                      | TTEST   |               | 0.003    |                 | 0.047    |              | 0.034    |               | 0.407    |             | 0.457    |                 | 0.978    |
| MYB TF               | AVERAGE | 1.000         | 21.074   | 1.000           | 1.264    | 1.000        | 2.987    | 1.000         | 0.672    | 1.000       | 0.631    | 1.000           | 1.361    |
|                      | SEM     | 0.054         | 2.078    | 0.060           | 0.326    | 0.230        | 0.083    | 0.093         | 0.148    | 0.173       | 0.081    | 0.175           | 0.282    |
|                      | TTEST   |               | 0.001    |                 | 0.470    |              | 0.007    |               | 0.135    |             | 0.125    |                 | 0.338    |
| GRAS TF              | AVERAGE | 1.000         | 19.726   | 1.000           | 1.208    | 1.000        | 5.585    | 1.000         | 0.914    | 1.000       | 0.535    | 1.000           | 1.258    |
|                      | SEM     | 0.049         | 1.612    | 0.206           | 0.382    | 0.035        | 0.560    | 0.133         | 0.042    | 0.288       | 0.144    | 0.435           | 0.333    |
|                      | TTEST   |               | 0.0003   |                 | 0.656    |              | 0.002    |               | 0.568    |             | 0.222    |                 | 0.663    |
| MADS-box TF          | AVERAGE | 1.000         | 7.112    | 1.000           | 1.385    | 1.000        | 2.039    | 1.000         | 0.750    | 1.000       | 0.933    | 1.000           | 0.844    |
|                      | SEM     | 0.303         | 4.337    | 0.035           | 0.195    | 0.043        | 0.627    | 0.232         | 0.243    | 0.438       | 0.317    | 0.378           | 0.046    |
|                      | TTEST   |               | 0.233    |                 | 0.124    |              | 0.114    |               | 0.499    |             | 0.907    |                 | 0.702    |

| D<br>Target gene     |         | Semper 30 dai |          | SGS27-02 _ 30 dai |          | Tobak 30 dai |          | Sparta 30 dai |          | Elan 30 dai |          | PSR 3628 _ 30 dai |          |
|----------------------|---------|---------------|----------|-------------------|----------|--------------|----------|---------------|----------|-------------|----------|-------------------|----------|
|                      |         | Control       | Infected | Control           | Infected | Control      | Infected | Control       | Infected | Control     | Infected | Control           | Infected |
| NBS                  | AVERAGE | 1.000         | 30.701   | 1.000             | 1.822    | 1.000        | 1.143    | 1.000         | 0.524    | 1.000       | 4.629    | 1.000             | 0.310    |
|                      | SEM     | 0.092         | 8.088    | 0.184             | 0.684    | 0.298        | 0.282    | 0.494         | 0.090    | 0.241       | 1.226    | 0.233             | 0.034    |
|                      | TTEST   |               | 0.016    |                   | 0.425    |              | 0.707    |               | 0.397    |             | 0.044    |                   | 0.043    |
| CC-NBS-LRR           | AVERAGE | 1.000         | 5.949    | 1.000             | 1.092    | 1.000        | 0.258    | 1.000         | 0.891    | 1.000       | 0.839    | 1.000             | 0.443    |
|                      | SEM     | 0.019         | 0.899    | 0.095             | 0.163    | 0.044        | 0.022    | 0.072         | 0.038    | 0.104       | 0.133    | 0.136             | 0.030    |
|                      | TTEST   |               | 0.005    |                   | 0.861    |              | 0.0001   |               | 0.251    |             | 0.193    |                   | 0.013    |
| Receptor-like Kinase | AVERAGE | 1.000         | 9.030    | 1.000             | 0.625    | 1.000        | 2.638    | 1.000         | 0.603    | 1.000       | 0.685    | 1.000             | 1.152    |
|                      | SEM     | 0.034         | 0.868    | 0.135             | 0.105    | 0.159        | 0.936    | 0.024         | 0.106    | 0.137       | 0.081    | 0.130             | 0.282    |
|                      | TTEST   |               | 0.001    |                   | 0.094    |              | 0.160    |               | 0.011    |             | 0.120    |                   | 0.650    |
| Casein Kinase        | AVERAGE | 1.000         | 0.905    | 1.000             | 0.922    | 1.000        | 1.538    | 1.000         | 0.702    | 1.000       | 0.916    | 1.000             | 0.962    |
|                      | SEM     | 0.018         | 0.158    | 0.179             | 0.132    | 0.034        | 0.227    | 0.149         | 0.088    | 0.110       | 0.051    | 0.125             | 0.262    |
|                      | TTEST   |               | 0.550    |                   | 0.743    |              | 0.079    |               | 0.160    |             | 0.529    |                   | 0.901    |
| Protein Phosphatase  | AVERAGE | 1.000         | 0.868    | 1.000             | 0.815    | 1.000        | 0.462    | 1.000         | 0.769    | 1.000       | 0.856    | 1.000             | 0.639    |
|                      | SEM     | 0.002         | 0.467    | 0.208             | 0.102    | 0.003        | 0.070    | 0.304         | 0.089    | 0.028       | 0.009    | 0.102             | 0.088    |
|                      | TTEST   |               | 0.729    |                   | 0.468    |              | 0.002    |               | 0.506    |             | 0.008    |                   | 0.055    |
| Protein Kinase       | AVERAGE | 1.000         | 0.326    | 1.000             | 0.747    | 1.000        | 1.735    | 1.000         | 0.576    | 1.000       | 0.822    | 1.000             | 0.484    |
|                      | SEM     | 0.008         | 0.045    | 0.147             | 0.113    | 0.071        | 0.222    | 0.159         | 0.026    | 0.101       | 0.068    | 0.155             | 0.027    |
|                      | TTEST   |               | 0.0001   |                   | 0.244    |              | 0.034    |               | 0.058    |             | 0.214    |                   | 0.025    |
| MYB TF               | AVERAGE | 1.000         | 2.617    | 1.000             | 0.534    | 1.000        | 0.475    | 1.000         | 0.706    | 1.000       | 0.595    | 1.000             | 2.195    |
|                      | SEM     | 0.089         | 0.035    | 0.172             | 0.161    | 0.057        | 0.069    | 0.020         | 0.098    | 0.036       | 0.073    | 0.077             | 0.539    |
|                      | TTEST   |               | 0.001    |                   | 0.119    |              | 0.004    |               | 0.043    |             | 0.008    |                   | 0.093    |
| GRAS TF              | AVERAGE | 1.000         | 4.910    | 1.000             | 1.300    | 1.000        | 0.469    | 1.000         | 0.704    | 1.000       | 1.319    | 1.000             | 2.463    |
|                      | SEM     | 0.012         | 1.614    | 0.330             | 0.071    | 0.155        | 0.117    | 0.135         | 0.245    | 0.085       | 0.073    | 0.037             | 0.530    |
|                      | TTEST   |               | 0.047    |                   | 0.423    |              | 0.052    |               | 0.349    |             | 0.047    |                   | 0.051    |
| MADS-box TF          | AVERAGE | 1.000         | 1.674    | 1.000             | 1.891    | 1.000        | 1.765    | 1.000         | 0.938    | 1.000       | 1.664    | 1.000             | 2.064    |
|                      | SEM     | 0.060         | 0.617    | 0.270             | 0.352    | 0.086        | 0.224    | 0.080         | 0.294    | 0.171       | 0.121    | 0.029             | 0.735    |
|                      | TTEST   |               | 0.244    |                   | 0.115    |              | 0.033    |               | 0.716    |             | 0.034    |                   | 0.221    |



Figure S1. BYDV-PAV titre for all barley and wheat samples with multifactorial ANOVA values.

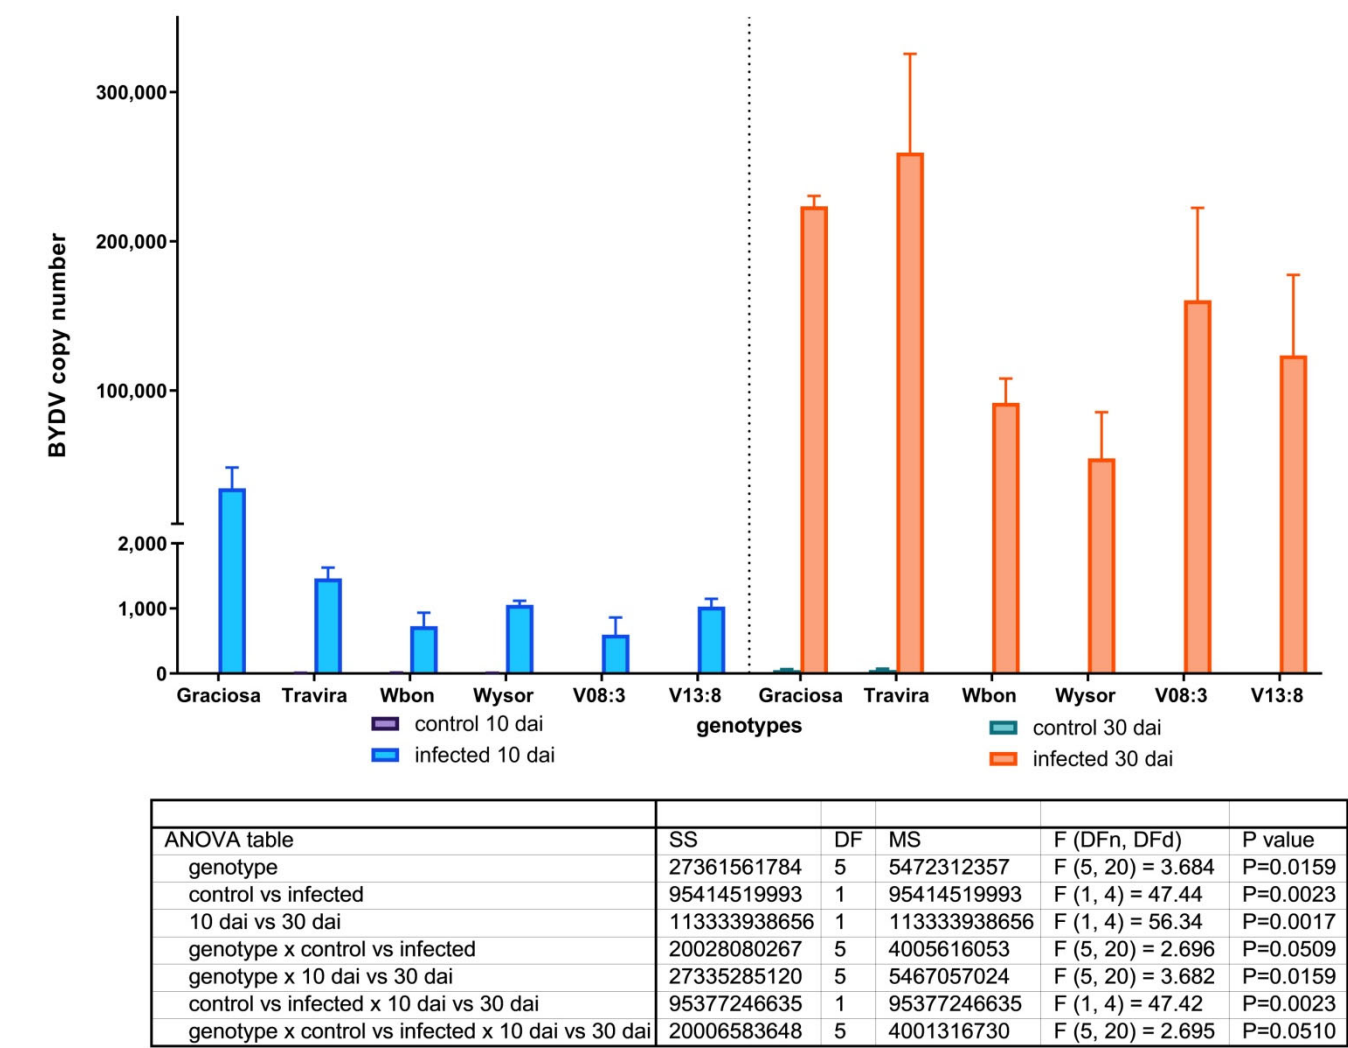

Supplement: s1 [file s1]
